# Supplementary material
Source: PubMed Central journal article supplement (PMC3785742)
Supplement: 1308867110_pnas.201308867SI.pdf [file 1308867110_pnas.201308867SI.pdf]

# Supporting Information

Chung et al. 10.1073/pnas.1308867110

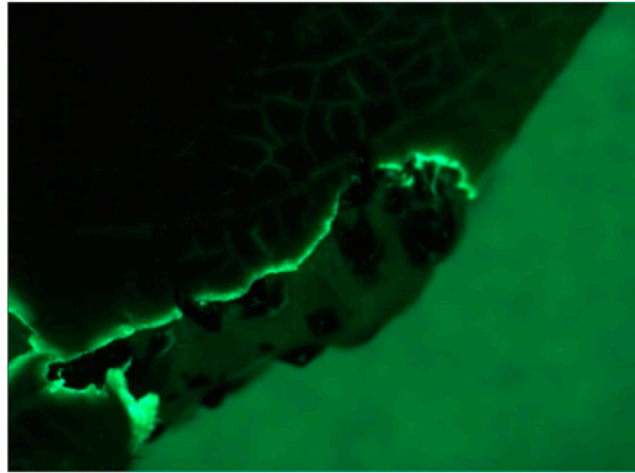

**Movie S1.** Live images of larva depositing oral secretions during herbivory. A larva of Colorado potato beetle is depositing oral secretions at the feeding site of a leaflet. Oral secretions are labeled with green fluorescent dye.

[Movie S1](#)

## Other Supporting Information Files

[SI Appendix \(docx\)](#)
